# Supplementary material
Source: ML conference proceedings conference paper supplement (https://proceedings.mlr.press/v130/khan21a.html)
Supplement: Supplementary file 1 [file khan21a-supp.zip]

Archive with 4 entries (4 files):
- supplementary.pdf
- __MACOSX/._supplementary.pdf
- supplementary_video.mp4
- __MACOSX/._supplementary_video.mp4
